# Supplementary material for: A novel thermoplastic shape memory polymer with solid-state plasticity derived from exchangeable hydrogen bonds
Source: Royal Society of Chemistry journal article supplement (doi:10.1039/d0ra00988a), 2020-01-01
Supplement: d0ra00988a1.pdf [file d0ra00988a1.pdf]

## A Novel Thermoplastic Shape Memory Polymer with Solid-State Plasticity Derived from Exchangeable Hydrogen Bonds

Xu Zhang<sup>a,b</sup>, Guangping Sun<sup>\*a</sup>, Xuequan, Zhang<sup>\*b</sup>

<sup>a</sup> Materials Science and Engineering, Jilin University, Changchun 130022, People's Republic of China E-mail: sungp@jlu.edu.cn

<sup>b</sup> Changchun Institute of Applied Chemistry, Chinese Academy of Sciences, Changchun 130022, People's Republic of China E-mail:

xqzhang@ciac.ac.cn

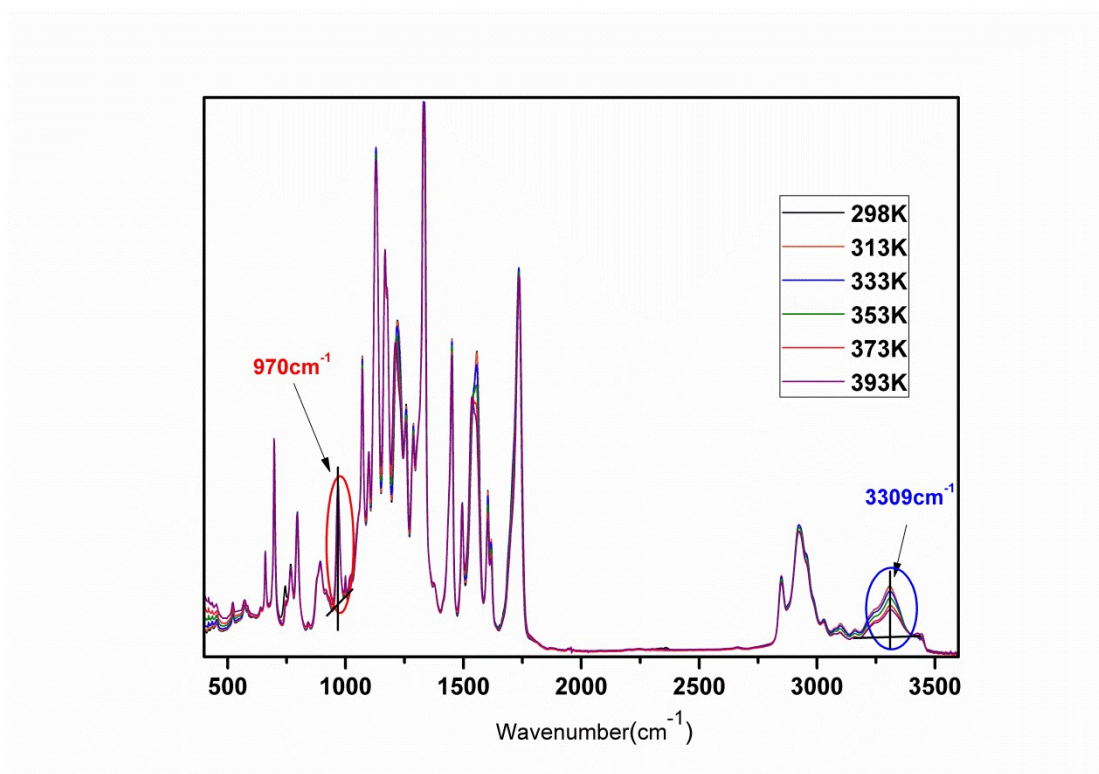

**Figure S1.** Full range variable temperature FTIR spectra of PBTP-30, molar ratio of N-H groups to the butadiene monomer units is calculate by the relative value ratio of peak height of hydrogen bonded N-H in  $3309\text{cm}^{-1}$  and trans-1,4 polybutadiene characteristic peak located at  $970\text{cm}^{-1}$ , the calculation value is 29mol%.

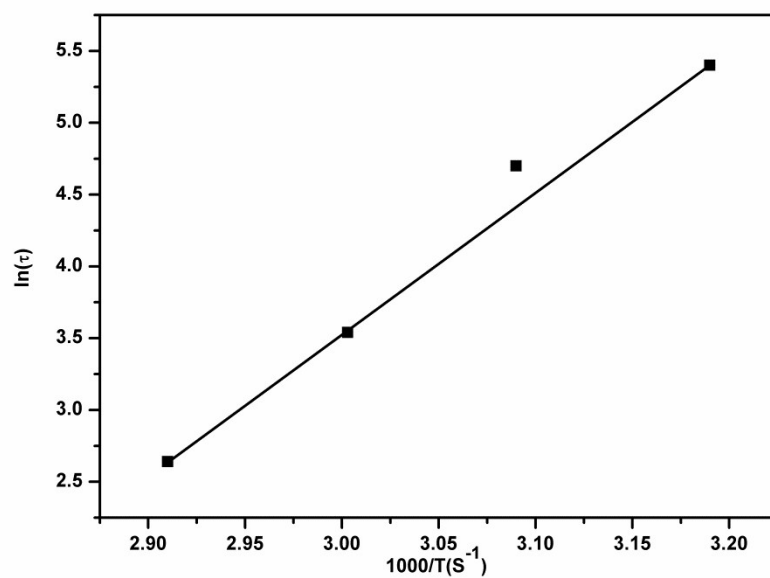

**Figure S2.** The  $\ln(\tau)$  variation as a function of  $1/T$ , which followed a simple Arrhenius law:

$$\tau(T) = \tau_0 \exp \frac{E_a}{RT}$$

with  $\tau$  the relaxation time (s),  $\tau_0$  a constant (s),  $E_a$  the activation energy ( $\text{J} \cdot \text{mol}^{-1}$ ),  $R$  the ideal gas constant ( $\text{J} \cdot \text{mol}^{-1} \cdot \text{K}^{-1}$ ) and  $T$  the temperature (K). The activation energy  $E_a$ , as calculated from the slope ( $E_a/R$ ), was  $77.59 \text{ kJ} \cdot \text{mol}^{-1}$ .
